# Supplementary material
Source: Royal Society of Chemistry journal article supplement (doi:10.1039/d6nr01331g)
Supplement: d6nr01331g1.pdf [file d6nr01331g1.pdf]

# Built-in Electric Field Induces High-Performance Hydrogen Evolution Reaction on a Self-Supporting MoO<sub>2</sub>-NiP/NF Heterojunction

Chunhui Bai,<sup>a</sup> Yu Shen,<sup>a</sup> Feng Yan,<sup>\*a</sup> Qiuye Wang,<sup>b</sup> Bo Geng,<sup>c</sup> Chunling Zhu<sup>\*b</sup> and Yujin Chen<sup>\*a</sup>

<sup>a</sup> Key Laboratory of In-Fiber Integrated Optics, Ministry of Education, College of Physics and Optoelectronic Engineering, Harbin Engineering University, Harbin 150001, China. E-mail: yanfeng@hrbeu.edu.cn; chen yujin@hrbeu.edu.cn

<sup>b</sup> Key Laboratory of Superlight Materials and Surface Technology, Ministry of Education, College of Chemistry and Chemical Engineering, Harbin Engineering University, Harbin 150001, China. E-mail: zhuchunling@hrbeu.edu.cn

<sup>c</sup> School of Physics and Engineering, Henan University of Science and Technology, Luoyang 471023, China.

## Experimental method

**Materials:** All chemical reagents were of analytical reagent grade and used without further purification. Specifically, nickel nitrate hexahydrate (Ni(NO<sub>3</sub>)<sub>2</sub>·6H<sub>2</sub>O) and commercial 20 wt% platinum on carbon (Pt/C) were procured from Tianjin Guangfu Fine Chemical Research Institute. Hydrochloric acid (HCl), ammonium molybdate tetrahydrate ((NH<sub>4</sub>)<sub>6</sub>Mo<sub>7</sub>O<sub>24</sub>·4H<sub>2</sub>O), and sodium hypophosphite monohydrate (NaH<sub>2</sub>PO<sub>2</sub>·H<sub>2</sub>O) were obtained from Shanghai Aladdin biochemical technology co., LTD.

## The processing of NF precursors

Following a reported procedure, the nickel mesh (3 cm\*3 cm) was initially ultrasonically cleaned in a 3:1 mixture of HCl and deionized water (20 mL HCl: 60 mL H<sub>2</sub>O) for 15 minutes. It was subsequently rinsed sequentially with 50 mL of deionized water and 50 mL of absolute ethanol under ultrasonication for 10 minutes each. Finally, the sample was thoroughly washed with deionized water and ethanol, and then dried overnight in a vacuum oven at 90°C.

### **Synthesis of NiMoO<sub>4</sub>/NF**

NiMoO<sub>4</sub> nanostructures were grown in situ on nickel foam (NF) via a facile hydrothermal method. In a typical synthesis, 0.9 g of Ni(NO<sub>3</sub>)<sub>3</sub>·6H<sub>2</sub>O and 0.31 g of (NH<sub>4</sub>)<sub>6</sub> Mo<sub>7</sub>O<sub>24</sub>·4H<sub>2</sub>O were dissolved in 40 mL of deionized water under constant magnetic stirring for 30 minutes. The homogeneous solution was then transferred into a 50 mL Teflon-lined stainless steel autoclave, sealed, and maintained at 160°C for 6 hours in an electric oven. After the autoclave was allowed to cool naturally to ambient temperature, the resulting NiMoO<sub>4</sub>/NF electrode was removed, rinsed thoroughly with deionized water and ethanol to remove any loosely adsorbed species, and finally dried overnight at 90°C in a vacuum oven.

### **MoO<sub>2</sub>-NiP/NF-400**

MoO<sub>2</sub>-NiP/NF-400 was synthesized via phosphidation process. The NiMoO<sub>4</sub>/NF precursor and NaH<sub>2</sub>PO<sub>2</sub> (phosphorus source) were loaded into two separate ceramic boats, with NaH<sub>2</sub>PO<sub>2</sub> positioned upstream in a tube furnace. Under a continuous argon flow, the temperature was raised to 400°C at a rate of 5°C min<sup>-1</sup> and held for 3 h. After naturally cooling to room temperature under argon, the final product, denoted as MoO<sub>2</sub>-NiP/NF-400, was collected for further use.

### **MoO<sub>2</sub>-NiP/NF-300 and MoO<sub>2</sub>-NiP/NF-500**

Following the aforementioned procedure, the heating temperature was increased to 300°C and subsequently to 500°C.

### **Structural characterization**

The crystal phase composition of the as-synthesized materials was determined by X-ray diffraction (XRD) on a Panalytical X'pert diffractometer using Cu K $\alpha$  radiation ( $\lambda=1.5418$  Å). Morphological and structural analyses were performed using a Hitachi SU70 scanning electron microscope (SEM) and an FEI Tecnai-F20 transmission electron microscope (TEM). The surface elemental composition and chemical states were characterized by X-ray photoelectron spectroscopy (XPS) on a Thermo Fisher Scientific instrument with an Al K $\alpha$  source.

### **Electrochemical testing**

All electrochemical measurements for the hydrogen evolution reaction (HER) were performed at room temperature in 1 M KOH using a standard three-electrode system on a CHI760E electrochemical workstation. The self-supporting MoO<sub>2</sub>-NiP/NF was used directly as the working electrode with a geometric area of 1 cm<sup>2</sup>, without any

binder or conductive additives. A saturated Hg/HgO electrode and a graphite rod served as the reference and counter electrodes, respectively. For comparison, 20 wt% Pt/C and IrO<sub>2</sub> electrodes were prepared by coating a uniform catalyst ink onto nickel foam. The ink was formulated by ultrasonically dispersing 8 mg of catalyst powder in a mixture of 1 mL ethanol and 40 uL Nafion solution for 30 min, resulting in a catalyst loading of approximately 2 mg cm<sup>-2</sup>.

The HER activity was evaluated from polarization curves obtained via linear sweep voltammetry (LSV) at a scan rate of 5 mV s<sup>-1</sup>. The corresponding Tafel slopes were calculated by fitting the data to the Tafel equation ( $\eta = a + b \log|j|$ ). The electrochemical double-layer capacitance ( $C_{dl}$ ) was estimated from cyclic voltammetry measurements within a non-Faradaic potential window (0.75 ~ 0.85 V vs. RHE) at scan rates varying from 100 to 180 mV s<sup>-1</sup>. Electrochemical impedance spectroscopy (EIS) was performed over a frequency range of 0.01 Hz to 100 kHz. Long-term stability was assessed by chronopotentiometry. All reported potentials were converted to the reversible hydrogen electrode (RHE) scale using the equation  $E_{RHE} = E_{Hg/HgO} + 0.059 \times \text{pH} + 0.098 \text{ V}$ , and the LSV data were  $iR$ -compensated post-measurement using  $E_{\text{compensated}} = E_{\text{measured}} - iR$ , where  $E_{\text{measured}}$  is the experimentally measured potential and  $E_{\text{compensated}}$  is the  $iR$ -compensated potential, and  $R$  represents the uncompensated solution resistance determined by the current interruption method.

### **TOF Calculation**

The turnover frequency (TOF) per active site was determined as follow. First, cyclic voltammetry was performed in phosphate buffer (pH = 7) at a scan rate of 50 mV s<sup>-1</sup> (potential range: -0.2 ~ 0.8 V vs. RHE) to quantify the number of active sites. The Faradaic charge was obtained after subtracting the background current. The number of active sites for the hydrogen evolution reaction,  $n(\text{mol})$ , and the TOF (s<sup>-1</sup>) were then calculated using the following equations:

$$n = Q / 2F$$

$$TOF = j / 2Fn$$

where  $j$  denotes the measured current density and  $F$  is the Faraday constant (96485.3 C mol<sup>-1</sup>).

Membrane electrode assemblies were fabricated using IrO<sub>2</sub>/NF as the anode and Pt/C/NF or MoO<sub>2</sub>-NiP/NF-400 as the cathode, respectively. Their electrochemical performance was evaluated and compared by linear sweep voltammetry in 1 M KOH at a scan rate of 5 mV·s<sup>-1</sup>.

### Calculation Details

All DFT calculations were performed using the CASTEP module in Materials Studio. The calculations covered the density of states (DOS), charge density difference, and adsorption energies. The Perdew-Burke-Ernzerhof (PBE) functional within the generalized gradient approximation (GGA) was employed to describe the exchange-correlation effects. A plane-wave energy cutoff of 400 eV was adopted for all structural relaxations, energy calculations, and electronic property analyses. A vacuum layer of 15 Å was introduced along the z direction to avoid spurious interactions between periodic images. The Brillouin zone was sampled using a 2 × 2 × 1 Monkhorst-Pack k-point grid.

The water adsorption energies ( $\Delta E_{\text{H}_2\text{O}}$ ) at the sample of surfaces were calculated by the equation of  $\Delta E_{(\text{H}_2\text{O})} = E_{\text{surf}+\text{H}_2\text{O}} - E_{\text{surf}} - E_{\text{H}_2\text{O}}$ , where the  $E_{\text{surf}}$  and the  $E_{\text{surf}+\text{H}_2\text{O}}$  are the total energies of the surface before and after water adsorption, and  $E_{\text{H}_2\text{O}}$  is the energy of a free water. The Gibbs free energies for hydrogen adsorption ( $\Delta G_{\text{H}^*}$ ) were calculated from the equation:  $\Delta G_{\text{H}^*} = \Delta E_{\text{H}^*} + \Delta \text{ZPE} - T\Delta S$ , where the  $\Delta E_{\text{H}^*}$ ,  $\Delta \text{ZPE}$ ,  $T$ , and  $\Delta S$  represent the binding energy, zero point energy change, temperature, and entropy change of H\* adsorption system, respectively. As the entropy of hydrogen in absorbed state is negligible,  $\Delta S$  can be calculated as  $-1/2 S_0$  ( $S_0$  is the entropy of H<sub>2</sub> in the gas phase at standard conditions, 1 bar of H<sub>2</sub> and pH = 0 at 300 K).

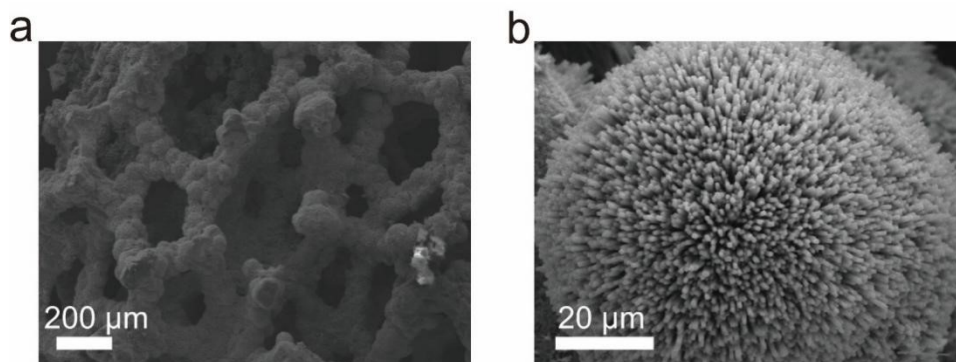

**Figure S1.** SEM images of (a,b) MoO<sub>2</sub>-NiP/NF-400.

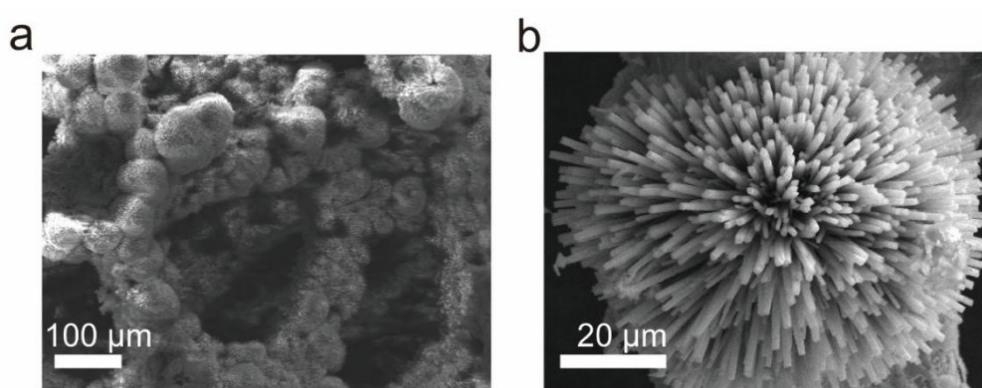

**Figure S2.** SEM images of (a,b) MoO<sub>2</sub>-NiP/NF-300.

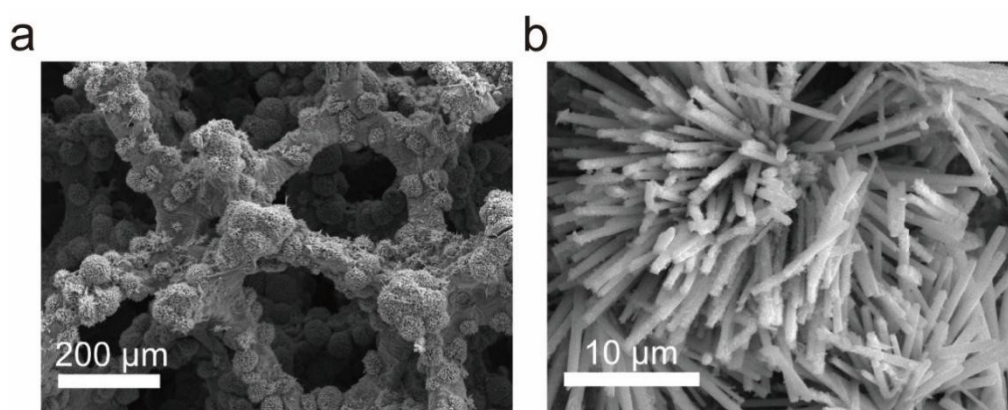

**Figure S3.** SEM images of (a,b) MoO<sub>2</sub>-NiP/NF-500.

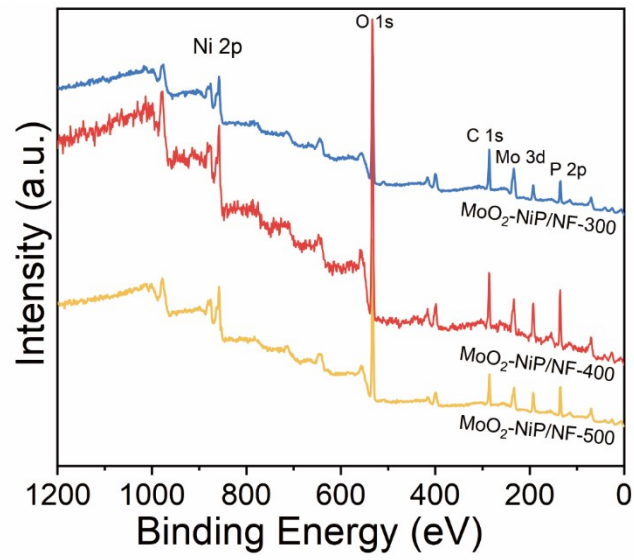

**Figure S4.** Survey XPS spectra of MoO<sub>2</sub>-NiP/NF-300, MoO<sub>2</sub>-NiP/NF-400, and MoO<sub>2</sub>-NiP/NF-500.

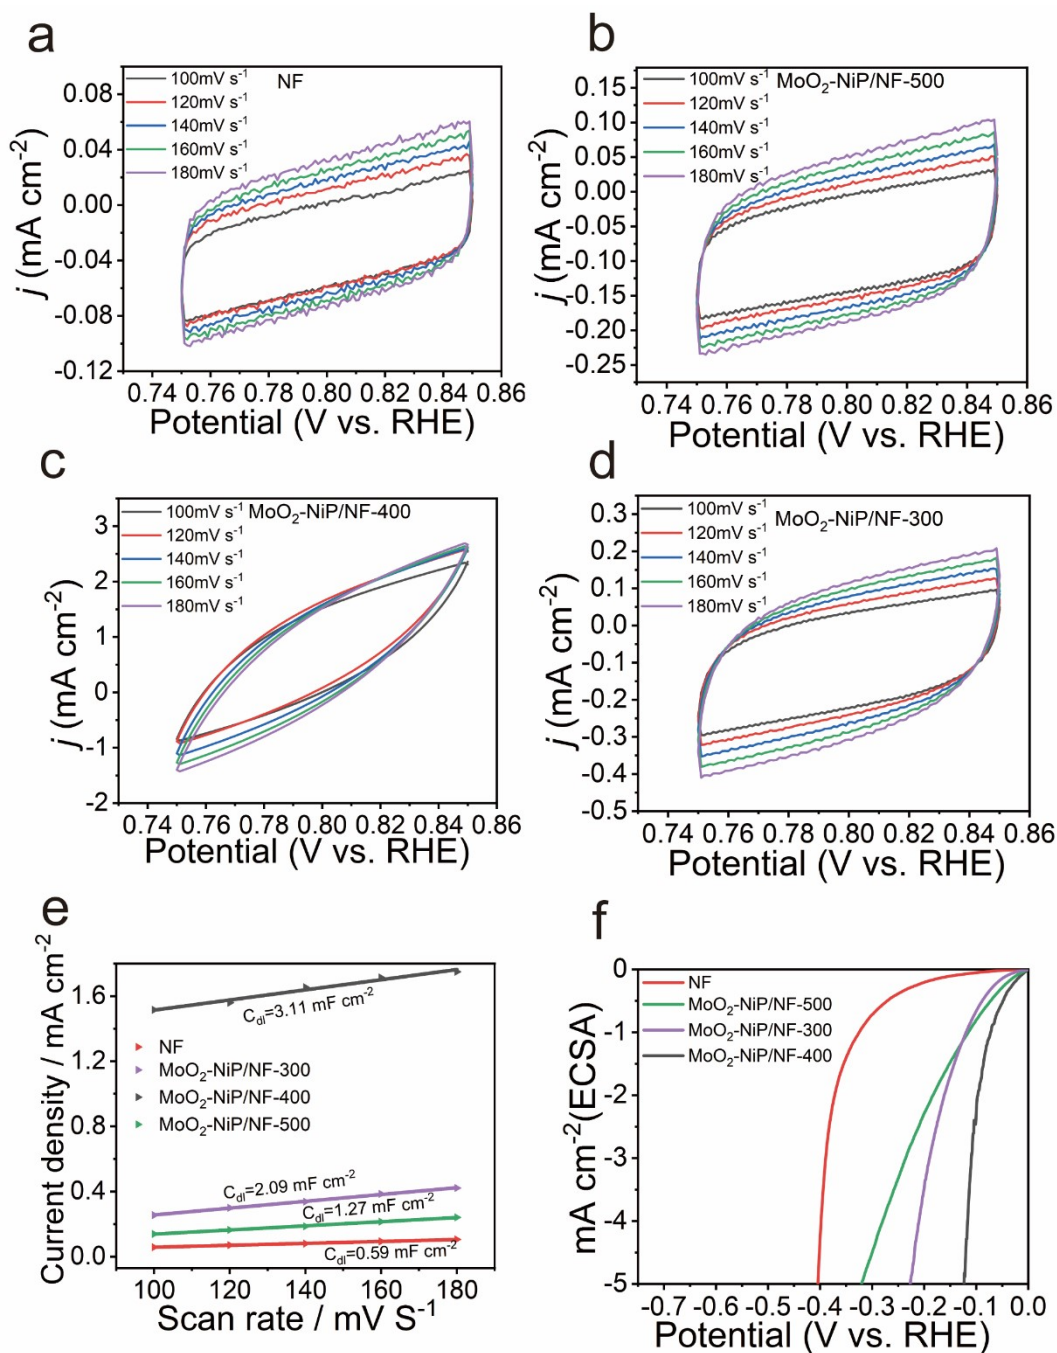

**Figure S5.** CV curves of (a) NF, (b)  $\text{MoO}_2\text{-NiP/NF-500}$ , (c)  $\text{MoO}_2\text{-NiP/NF-400}$ , and (d)  $\text{MoO}_2\text{-NiP/NF-300}$  at scan rates from 100 to 180  $\text{mV s}^{-1}$  in 1 M KOH. (e) The double-layer capacitance ( $C_{dl}$ ) values for NF,  $\text{MoO}_2\text{-NiP/NF-500}$ ,  $\text{MoO}_2\text{-NiP/NF-400}$ , and  $\text{MoO}_2\text{-NiP/NF-300}$ . (f) ECSA-normalized HER polarization curves of different catalysts.

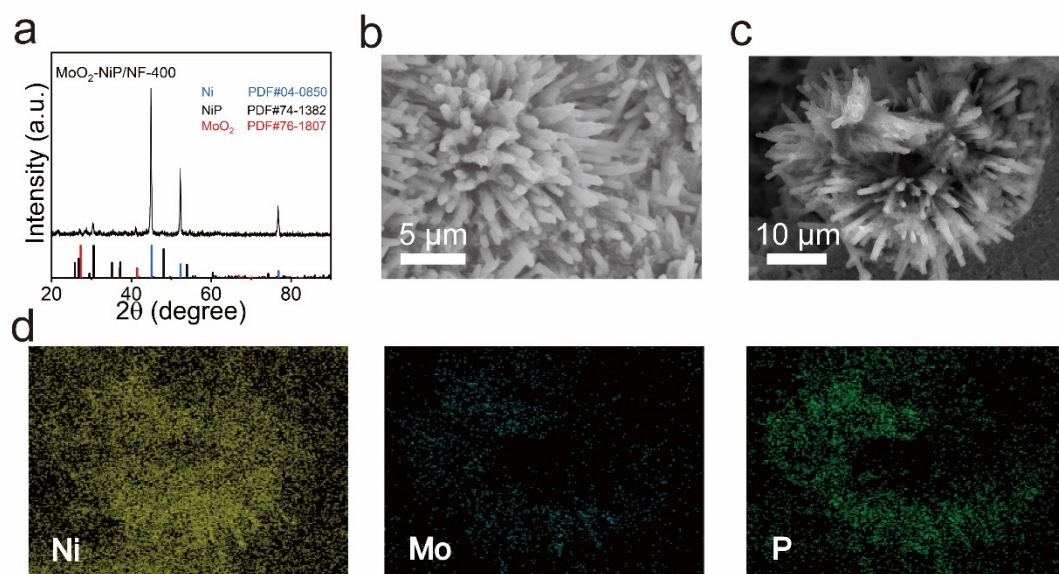

**Figure S6.** (a) XRD pattern of MoO<sub>2</sub>-NiP/NF-400 after HER testing. (b, c) SEM images and (d) EDS elemental mapping of MoO<sub>2</sub>-NiP/NF-400 after HER testing.

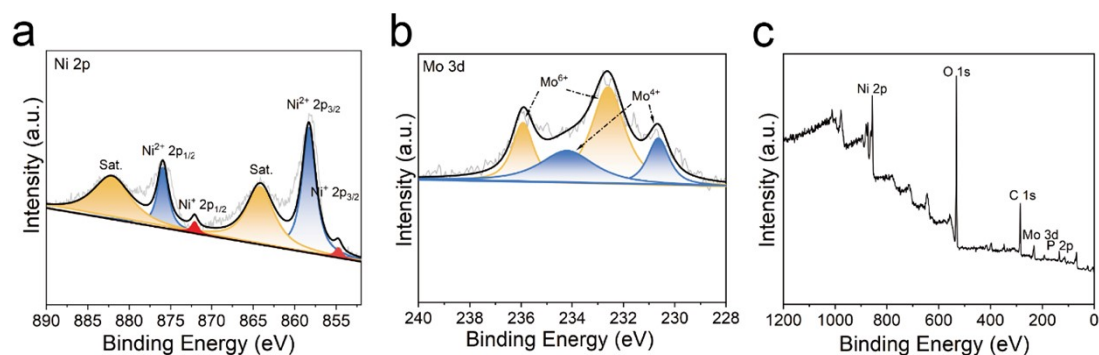

**Figure S7.** XPS spectra of (a) Ni 2p, (b) Mo 3d, and (c) survey spectrum for MoO<sub>2</sub>-NiP/NF-400 after HER testing.

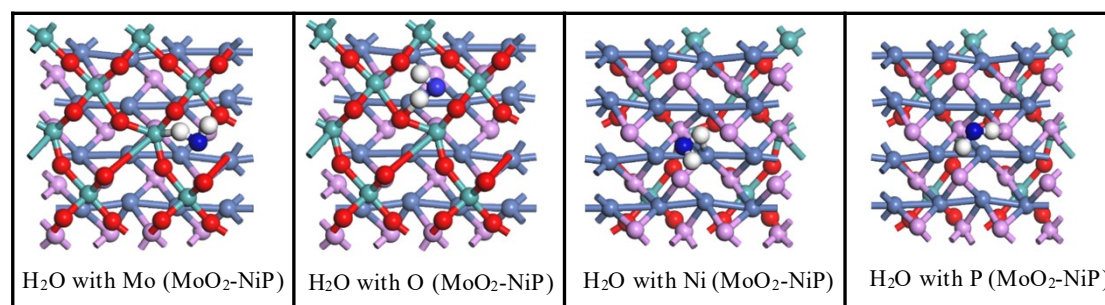

**Figure S8.** Water molecule adsorption models on different adsorption sites (Ni, Mo, O, P). Colors represent the following atoms: red (O from the surface), dark blue (O from the water molecule), cyan (Mo), pink (P), light blue (Ni), and white (H).

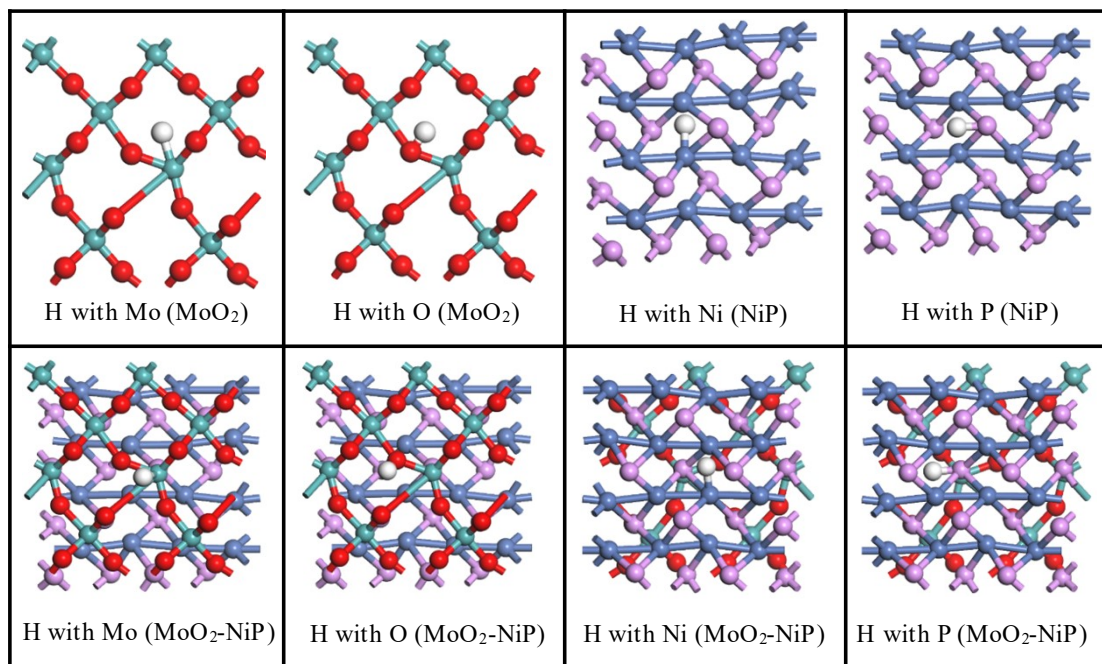

**Figure S9.** H atom adsorption models on different adsorption sites (Ni, Mo, O, P). Colors represent the following atoms: white (H), light blue (Ni), cyan (Mo), red (O), and pink (P).

**Table S1.** The mass ratios of NiP to MoO<sub>2</sub> in MoO<sub>2</sub>-NiP/NF-300, MoO<sub>2</sub>-NiP/NF-400, and MoO<sub>2</sub>-NiP/NF-500.

| Mass percentage (wt.%) | NiP/MoO <sub>2</sub> |
|------------------------|----------------------|
| 300°C                  | 0.48                 |
| 400°C                  | 0.87                 |
| 500°C                  | 1.78                 |

**Table S2.** Comparison of HER activities of MoO<sub>2</sub>-NiP/NF-400 with recent reported metal phosphides catalysts in 1 M KOH.

| Catalysts                                            | Overpotential @<br>10 mA cm <sup>-2</sup><br>(mV) | Tafel slope<br>(mV dec <sup>-1</sup> ) | References |
|------------------------------------------------------|---------------------------------------------------|----------------------------------------|------------|
| MoO <sub>2</sub> -NiP/NF-400                         | 19                                                | 22.18                                  | This work  |
| MoC-Mo <sub>2</sub> C                                | 114                                               | 62                                     | [1]        |
| NiS <sub>2</sub> /CoS <sub>2</sub> /MoS <sub>2</sub> | 112                                               | 59                                     | [2]        |

|                                           |     |       |      |
|-------------------------------------------|-----|-------|------|
| <b>Fe-NiMo alloy</b>                      | 28  | 33.92 | [3]  |
| <b>Fe-CoP-1</b>                           | 85  | 68.7  | [4]  |
| <b>CNSC/NF</b>                            | 80  | 65    | [5]  |
| <b>CN/CNL/MoS<sub>2</sub>/CP</b>          | 106 | 117   | [6]  |
| <b>Ni-Mo-P/NF</b>                         | 53  | 47.18 | [7]  |
| <b>N-MoS<sub>2</sub>/AOCF-C</b>           | 166 | 48.83 | [8]  |
| <b>CoS<sub>2</sub>/MoS<sub>2</sub>@CC</b> | 71  | 62.8  | [9]  |
| <b>NiO@NF-16</b>                          | 109 | 103.9 | [10] |
| <b>Cu-CoS<sub>x</sub>/NF</b>              | 75  | 64.6  | [11] |
| <b>Mo-Ni<sub>3</sub>S<sub>2</sub></b>     | 144 | 68.47 | [12] |

## References

1. W. Liu, X. Wang, F. Wang, K. Du, Z. Zhang, Y. Guo, H. Yin and D. Wang, *Nat. Commun.*, 2021, **12**, 6776.
2. Y. Zhang, M. Shi, C. Wang, Y. Zhu, N. Li, X. Pu, A. Yu and J. Zhai, *Sci. Bull.*, 2020, **65**, 359-366.
3. B. Zhao, M. Chen, J. Zhang, H. Sun, B. Zhao, D. Li, Y. Wu, T. Zhou, F. Liu, H. Cui and Q. Liu, *Chem. Eng. J.*, 2026, **536**, 175938.
4. P. Zhou, Z. Li, Y. Zhang, H. Zhang, M. Zhang, D. Han and X. Chen, *Int. J. Hydrogen Energy*, 2025, **145**, 139-146.
5. F. Jiang, Y. Wang, H. Peng, Y. Wu, Z. Zhang, Y. Li, S. Zhong, X. Chen, J. Li, Y. Wang, J. Peng and M. Zhai, *Appl. Catal. B: Environ. Energy*, 2025, **372**, 125326.
6. J. Dong, X. Zhang, J. Huang, J. Hu, Z. Chen and Y. Lai, *Chem. Eng. J.*, 2021, **412**, 128556.
7. Y. Wei, T. Yu, H. Zhao, X. Wu, L. Sun and S. Mu, *Int. J. Hydrogen Energy*, 2026, **235**, 155137.
8. X. Lu, T. Tao, Y. Zhang, S. Lu, J. Xie, Z. Ding and Z. Wu, *ChemistrySelect*, 2023, **8**, e202204699.
9. G. Zhou, X. Wu, M. Zhao, H. Pang, L. Xu, J. Yang and Y. Tang, *ChemSusChem*, 2021, **14**, 699-708.
10. I. A. Poimenidis, M. Lykaki, S. Moustazis, P. Loukakos and M. Konsolakis, *Mater. Chem. Phys.*, 2023, **305**, 128007.
11. H. He, L. Zeng, X. Peng, Z. Liu, D. Wang, B. Yang, Z. Li, L. Lei, S. Wang and Y. Hou, *Chem. Eng. J.*, 2023, **451**, 138628.
12. J. Li, X. Meng, X. Qi and Y. Fang, *J. Electroanal. Chem.*, 2026, **1012**, 120103.
